# Supplementary material for: The Burden of Decisional Regret in Haemodialysis in South Asian Lower Middle Income Countries
Source: Research Square preprint supplement (doi:10.21203/rs.3.rs-6306598/v1), 2025-06-16
Supplement: Supplementary file 1 [file be63ea357e47469ee8cc082a.docx]

**QUESTIONNAIRE**

**Title: Exploring Dialysis Regret amongst chronic dialysis patients: a cross-sectional analysis**

1. **Serial No:**
2. **Age:**

- less than 20
- 21-35
- 36-50
- 51-65
- 66-80
- 81+

**3. Sex:**

- M / F

**4. Marital Status:**

- Single
- Married
- Divorced
- Widowed

**5. Time on dialysis:**

- years = ______

**6. Residence: Country?**

__________

**7. Level of education:**

- Less than 5 years of schooling
- 5 - 10 years of schooling
- Secondary school or high school
- Undergraduate
- Postgraduate

**8. Do you have to pay for dialysis?**

- Yes
- No
- Partially

**9. What was your access when you started dialysis?**

- Temporary catheter
- Permanent catheter
- Arteriovenous fistula
- Peritoneal dialysis

**10. What type of dialysis are you currently on?**

- Hemodialysis
- Peritoneal dialysis

**11. Mode of presentation**

- Elective
- Emergency

**12. Did you attend a kidney clinic or see a nephrologist before your dialysis was initiated?**

- Yes / No

**13. Was it your own decision to start dialysis?**

- Yes / No

**14. (if no to above) Who made the decision on your behalf?** (can select multiple options)

- Family members
- Friends
- Treating physician
- Other: _______

**15. Decision Regret Scale:**

Please think about the decision for dialysis, and answer the statements below about how you feel about it:

|  | Strongly agree | Agree | Neither agree nor disagree | Disagree | Strongly disagree |
| --- | --- | --- | --- | --- | --- |
| It was the right decision | 1 | 2 | 3 | 4 | 5 |
| I regret the choice that was made | 1 | 2 | 3 | 4 | 5 |
| I would go for the same choice if I had to do it over again | 1 | 2 | 3 | 4 | 5 |
| The choice did me a lot of harm | 1 | 2 | 3 | 4 | 5 |
| The decision was a wise one | 1 | 2 | 3 | 4 | 5 |

Score (5 to 25) = __________

**16. At the time kidney replacement therapy was discussed with you, which of the following treatment options were you made aware of?** (can select multiple options)

- Hemodialysis
- Peritoneal dialysis
- Non-dialysis treatment/conservative kidney management
- Kidney transplantation

**17. How difficult is it for you to adhere to your dialysis schedule?
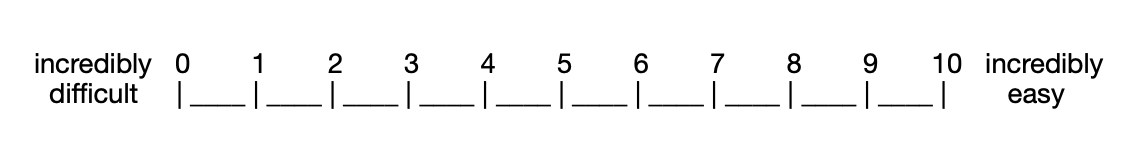
**

**18. Was there a spiritual or religious motivation behind the decision to initiate and continue dialysis?**

- Yes/ No

**19. Do you feel like a burden to your caregivers?**

- Yes / No

**20. Quality of life scale (EQD-5D-5L)**

The following scale measures your quality of life, after initiation of dialysis, today.

Please select the **single** most appropriate answer from each row.

|  | **1** | **2** | **3** | **4** | **5** |
| --- | --- | --- | --- | --- | --- |
| **MOBILITY** | I have no problems in walking about | I have slight problems in walking about | I have moderate problems in walking about | I have severe problems in walking about | I am unable to walk about |
| **SELF-CARE** | I have no problems washing or dressing myself | I have slight problems washing or dressing myself | I have moderate problems washing or dressing myself | I have severe problems washing or dressing myself | I am unable to wash or dress myself |
| **USUAL ACTIVITIES**  (eg, work, study, homework, family or leisure activities) | I have no problems doing my usual activities | I have slight problems doing my usual activities | I have moderate problems doing my usual activities | I have severe problems doing my usual activities | I am unable to do my usual activities |
| **PAIN/DISCOMFORT** | I have no pain or discomfort | I have slight pain or discomfort | I have moderate pain or discomfort | I have severe pain or discomfort | I have extreme pain or discomfort |
| **ANXIETY/DEPRESSION** | I am not anxious or depressed | I am slightly anxious or depressed | I am moderately anxious or depressed | I am severely anxious or depressed | I am extremely anxious or depressed |

**21. On the scale below, how would you rank your health on the day you started dialysis:**

**
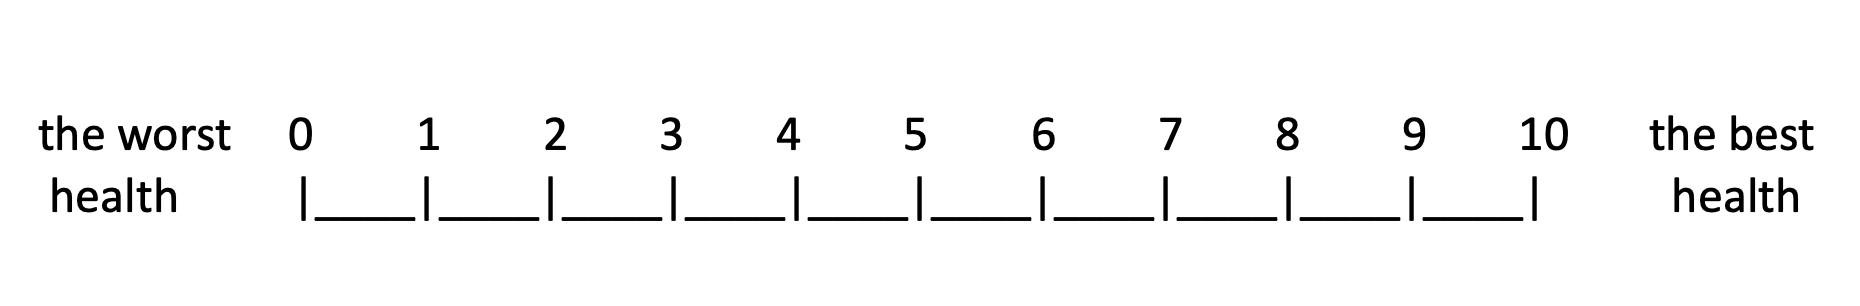
**

**22. On the scale below, how would you rank your health today:**

**
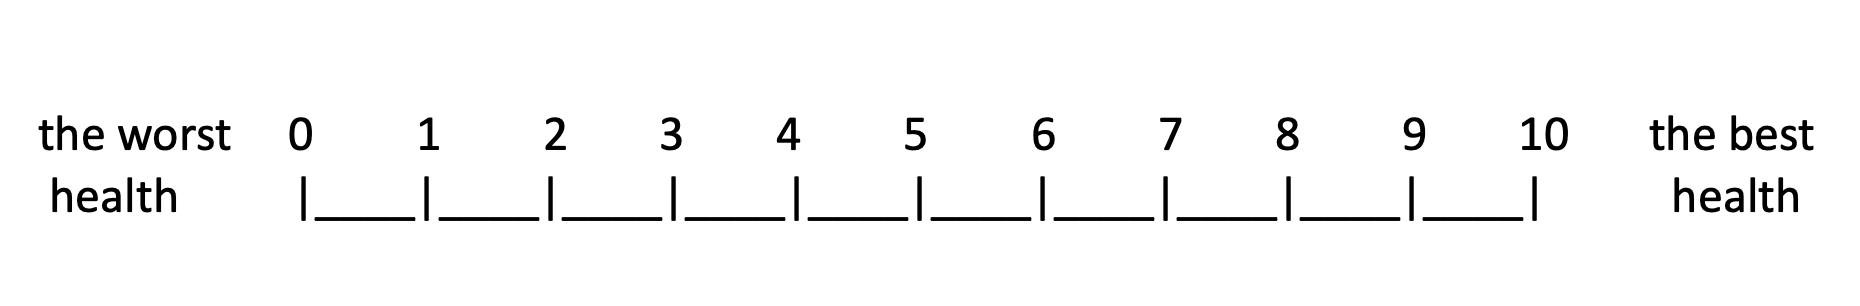
**

Decision Regret Scale:

<https://decisionaid.ohri.ca/docs/develop/Tools/Regret_Scale.pdf>

EQD 5D 5L:

<https://aci.health.nsw.gov.au/__data/assets/pdf_file/0003/632847/EuroQol-5-Dimension.pdf>
